# Supplementary material
Source: publisher figshare collection journal article supplement (https://acs.figshare.com/ndownloader/files/31083942)
Supplement: Supplementary file 1 [file 31083942]

*Supporting information*

# Achieving Direct Z-scheme Charge Transfer through Constructing 2D/2D $\alpha$ -Fe<sub>2</sub>O<sub>3</sub>/CdS Heterostructure for Efficient Photocatalytic CO<sub>2</sub> Conversion

*Liyuan Long<sup>1,2,†,\*</sup>, Gangyang Lv<sup>1,‡</sup>, Qiutong Han<sup>2</sup>, Xianchen Wu<sup>1</sup>, Yu Qian<sup>1</sup>, Dunhui*

*Wang<sup>1,\*</sup>, Yong Zhou<sup>2,\*</sup>, and Zhigang Zou<sup>2,\*</sup>*

<sup>1</sup> Micro-Electronics Research Institute and School of Electronics and Information,

Hangzhou Dianzi University, Hangzhou 310018, China

<sup>2</sup> National Laboratory of Solid State Microstructures and Department of Physics,

Nanjing University, Nanjing 210093, China

Email: liyuan-long@hdu.edu.cn; wangdh@hdu.edu.cn; zhouyong1999@nju.edu.cn;

zgzou@nju.edu.cn

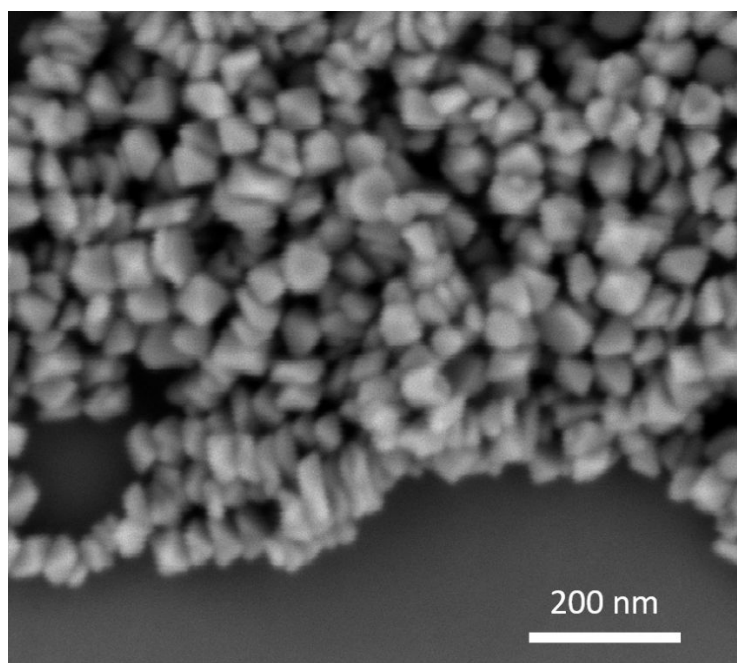

**Figure S1.** The FESEM image of  $\alpha$ -Fe<sub>2</sub>O<sub>3</sub> nanoparticles fabricated under the precursor solution with 1.4 ml water and without any other growth condition difference compared to  $\alpha$ -Fe<sub>2</sub>O<sub>3</sub> NSs.

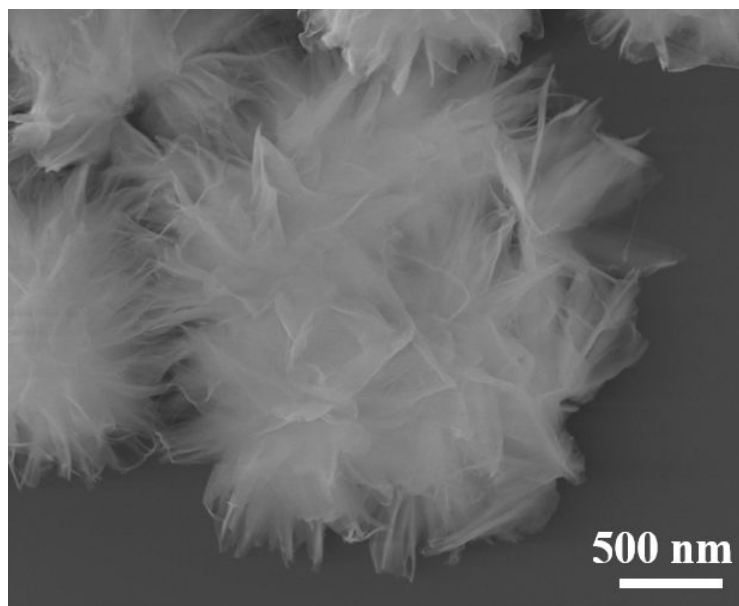

**Figure S2.** The FESEM image of pure CdS nanosheets. These CdS nanosheets interlace to each other and form hierarchical flower-like microsphere which is highly beneficial to expose their surface for interaction with  $\alpha$ -Fe<sub>2</sub>O<sub>3</sub> nanosheets.

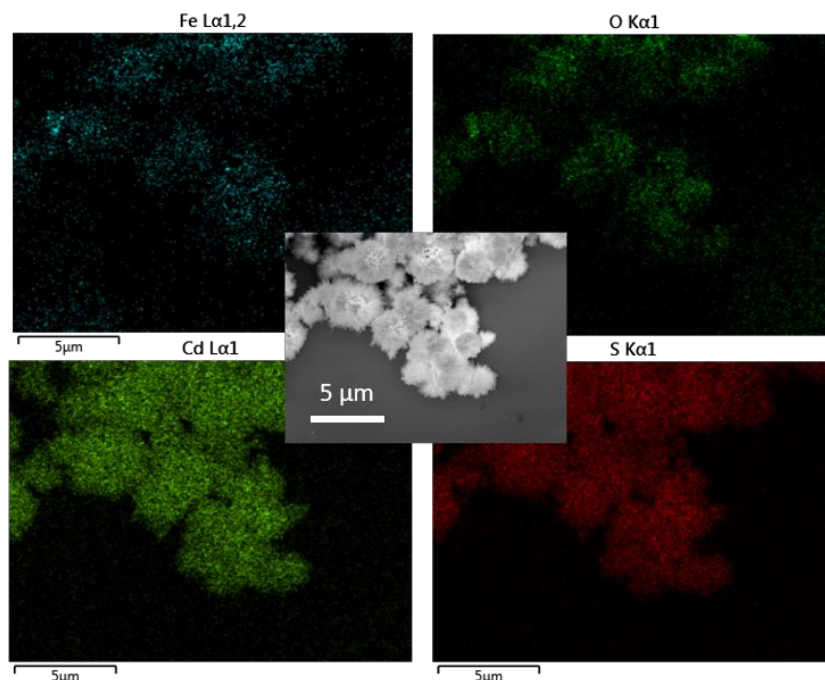

**Figure S3.** The EDX mappings of Fe, O, Cd, S elements and the corresponding FESEM image of large area of  $\alpha\text{-Fe}_2\text{O}_3\text{@CdS}$  heterostructure. To obtain the EDX mappings, the corresponding FESEM image is acquired at 20 KV, leading to exhibiting hierarchical microspheres with relatively vague surface morphology. The distribution of Fe and O elements uniformly correspond to their morphology image as well as element distribution of Cd and S, effectively demonstrating the formation of homogenous  $\alpha\text{-Fe}_2\text{O}_3\text{@CdS}$  heterostructure.



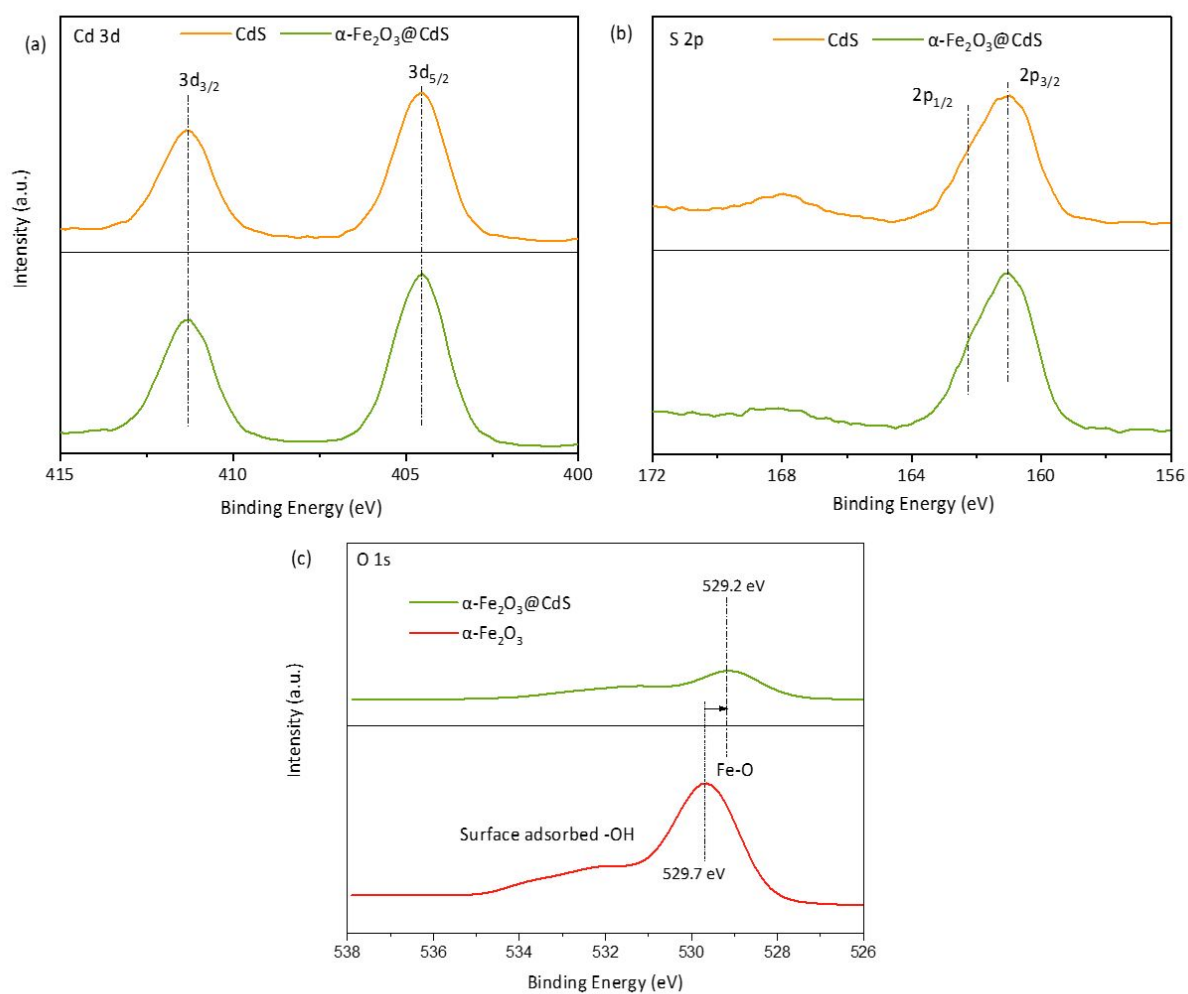

**Figure S4.** High-resolution XPS spectra of (a) Cd 3d, (b) S 2p and (c) O1s. The left shoulder of O1s XPS spectra should come from surface adsorbed hydroxyl.<sup>1</sup>

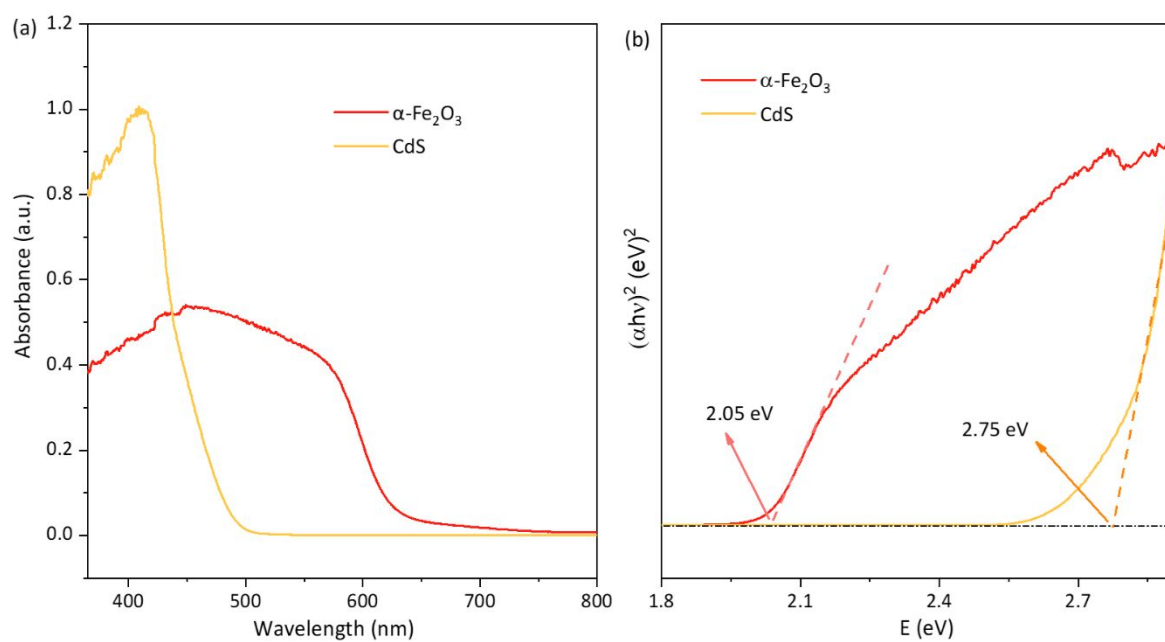

**Figure S5.** (a) UV-vis diffusive reflectance spectra of pure  $\alpha$ -Fe<sub>2</sub>O<sub>3</sub> NSs and CdS NSs.

(b) Tauc plots of direct-bandgap  $\alpha$ -Fe<sub>2</sub>O<sub>3</sub> and CdS converted from spectra in [Figure](#)

[S5a](#) according to Kubelka-Munk functions.



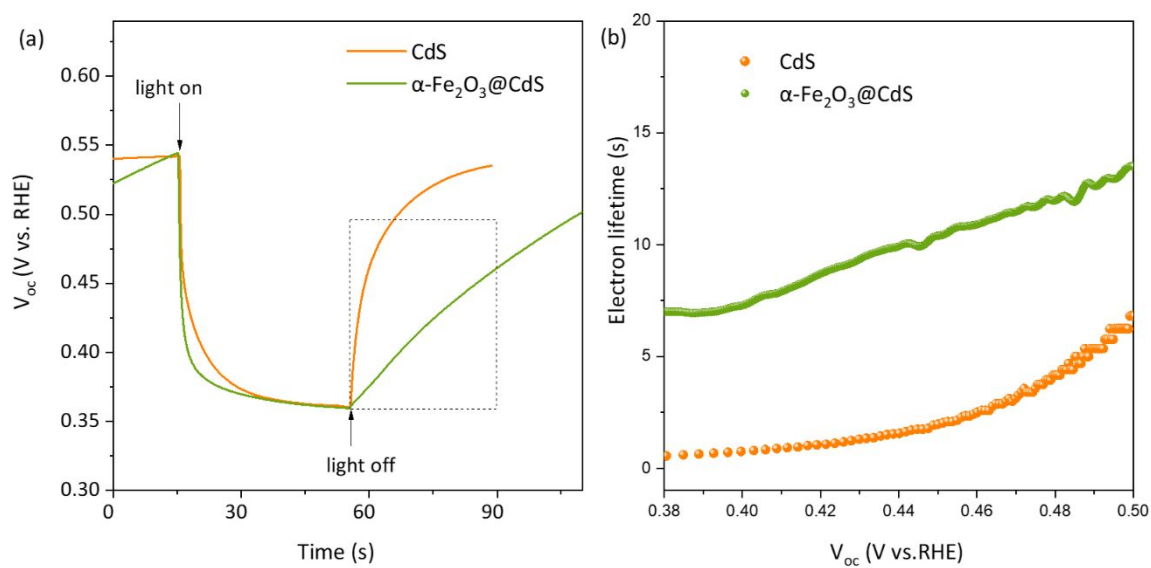

**Figure S6.** (a) Transient open circuit potential plots under simulated solar light-switching. (b) The photoelectron lifetime under different potential converted from the decay dynamics of  $V_{oc}$  at the moment of light off.<sup>2-3</sup>

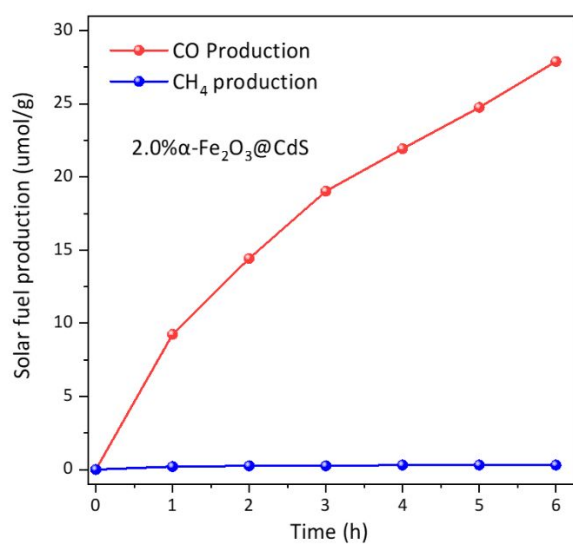

**Figure S7.** Comparison of CO and CH<sub>4</sub> production of photocatalytic CO<sub>2</sub> conversion for 2% $\alpha$ -Fe<sub>2</sub>O<sub>3</sub>@CdS heterostructure. The negligible CH<sub>4</sub> production which is beyond the detection accuracy of gas chromatograph reflects the high product selectivity of  $\alpha$ -Fe<sub>2</sub>O<sub>3</sub>@CdS photocatalyst for CO<sub>2</sub> conversion.

## REFERENCES

- [1] Pan, J.; Guo, F.; Sun, H.; Li, M.; Zhu, X.; Gao, L.; Shi, W. Nanodiamond Decorated 2D Hexagonal Fe<sub>2</sub>O<sub>3</sub> Nanosheets with a Z-Scheme Photogenerated Electron Transfer Path for Enhanced Photocatalytic Activity. *J. Mater. Sci.* **2021**, *56*, 6663-6675.
- [2] Yang, H.; Fan, W.; Vaneski, A.; Susha, A. S.; Teoh, W. Y.; Rogach, A. L. Heterojunction Engineering of CdTe and CdSe Quantum Dots on TiO<sub>2</sub> Nanotube Arrays: Intricate Effects of Size-Dependency and Interfacial Contact on Photoconversion Efficiencies. *Adv. Funct. Mater.* **2012**, *22*, 2821-2829.

[3] Bang, J. H.; Kamat, P. V. Solar Cells by Design: Photoelectrochemistry of  $\text{TiO}_2$

Nanorod Arrays Decorated with CdSe. *Adv. Funct. Mater.* **2010**, *20*, 1970-1976.
